# Supplementary material for: Are type 316L stainless steel coin cells stable in nonaqueous carbonate solutions containing NaPF6 or KPF6 salt?
Source: Royal Society of Chemistry journal article supplement (doi:10.1039/c9ta10847e), 2019-01-01
Supplement: c9ta10847e1.pdf [file c9ta10847e1.pdf]

Electronic Supplementary Material (ESI) for Journal of Materials Chemistry A.  
This journal is © The Royal Society of Chemistry 2019

### Supplementary Information

## Are Type 316L Stainless Steel Coin Cells Stable in Nonaqueous Carbonate Solutions Containing NaPF<sub>6</sub> or KPF<sub>6</sub> salt?

Hee Jae Kim<sup>a</sup>, Hitoshi Yashiro<sup>b</sup>, Hyungsub Kim<sup>c</sup>, Seoungsu Lee<sup>c</sup>, Seung-Taek Myung<sup>\*a</sup>

<sup>a</sup>*Department of Nano Technology and Advanced Materials Engineering, Sejong University, Gunja-dong, Gwangjin-gu, Seoul 05006, South Korea*

<sup>b</sup>*Department of Chemistry and Bioengineering, Iwate University, 4-3-5 Ueda, Morioka, Iwate 020-8551, Japan*

<sup>c</sup>*Korea Atomic Energy Research Institute, Daedeok-daero 989 Beon-Gil, Yuseong-gu, Daejeon 34507, South Korea*

**Table S1.** The chemical composition of type 316L stainless steel.

| <b>Element</b> | <b>Concentration of element (mass %)</b> |
|----------------|------------------------------------------|
| <b>C</b>       | <b>0.03</b>                              |
| <b>Mn</b>      | <b>2</b>                                 |
| <b>P</b>       | <b>0.045</b>                             |
| <b>S</b>       | <b>0.03</b>                              |
| <b>Si</b>      | <b>0.75</b>                              |
| <b>Cr</b>      | <b>16-18</b>                             |
| <b>Ni</b>      | <b>10-14</b>                             |
| <b>Mo</b>      | <b>2-3</b>                               |
| <b>N</b>       | <b>0.1</b>                               |
| <b>Fe</b>      | <b>Balance</b>                           |

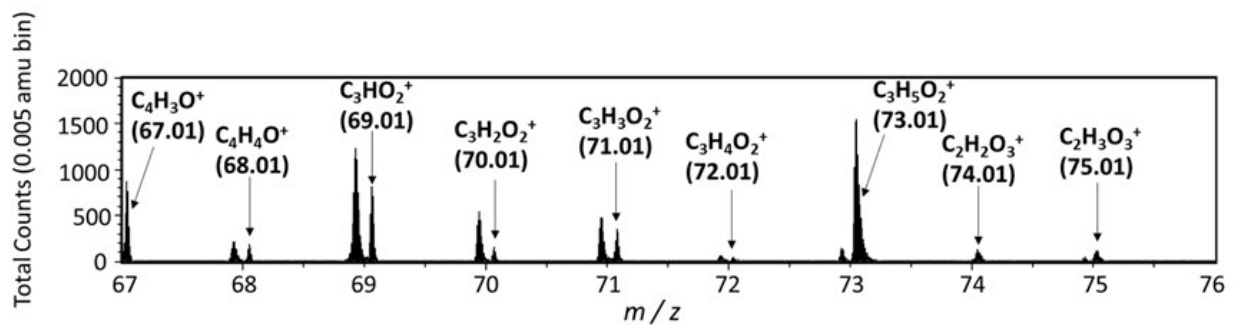

**Fig. S1.** ToF-SIMS spectra for the surface of type 316L SS transiently polarized at 4 V, and (e) 5 V versus Na<sup>+</sup>/Na. For the index of fragments, CrO<sup>+</sup> ( $m = 67.93$ ), CrF<sup>+</sup> ( $m = 70.93$ ), FeO<sup>+</sup> ( $m = 71.92$ ), and FeF<sup>+</sup> ( $m = 74.93$ ) fragments are indicated in Figs. 3 and 6.

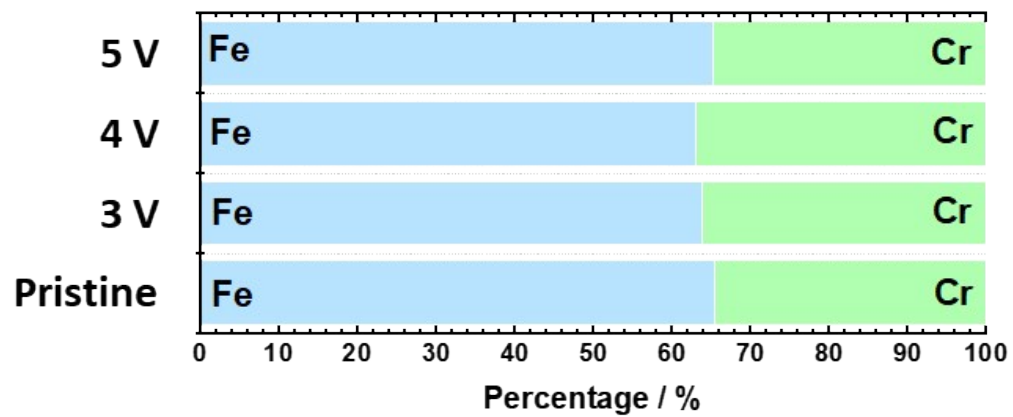

**Fig. S2.** Chromium/iron atomic ratio in oxide layer on type 316L SS polarized at each potential in Na solution based on XPS analysis.
